# Supplementary material for: Rotational restriction of nascent peptides as an essential element of co-translational protein folding: possible molecular players and structural consequences
Source: PubMed Central journal article supplement (PMC5452302; doi:10.1186/s13062-017-0186-1), 2017-05-31
Supplement: 13062_2017_186_MOESM2_ESM.pdf [file 13062_2017_186_MOESM2_ESM.pdf]

Genbank IDs of archaeal peptidyl prolyl isomerases that contain domains homologous to the C-terminal peptide-binding domains of bacterial trigger factors.

490141180  
399240172  
1088762454  
495658969  
909649990  
1097353159  
1086400306  
517069813  
1103315236  
494805044  
970570542  
811260002  
521281767  
1097623688  
495849885  
1094368135  
445752961  
506243483  
445671409  
495592617  
909693565  
495439252  
541189638  
1094712985  
495368886  
968521212  
494484937  
491112154  
491118268  
541203049  
445645979  
495599852  
1090714506  
490164541  
910069402  
968126923  
909668242  
491099079  
1097658306  
491708793  
909674048  
910073540  
1103306079  
505133720  
445622068  
541179776  
910244091  
493705138  
1100834574  
445621075  
1086559941  
397684285  
910233034  
909680708  
493474967  
968553123  
961365054  
910083988  
492945767  
1088842533  
544639160  
493699037  
928944473  
503806626  
495701289  
1054518949  
1084275726  
909660095  
490730012  
491677802

557612670  
490156157  
499542727  
494348647  
499642524  
909709337  
910009483  
493185377  
972339273  
490388342  
495584155  
490650462  
851124370  
910015590  
495016547  
492981202  
503646618  
495861375  
496124926  
491746797  
1086502794  
909681785  
910245949  
909686649  
1054611524  
506268508  
927059285  
495274075  
493053887  
1094765193  
1097600219  
490151466  
495721178  
909667367  
506389838  
493678473  
909645146  
910055063  
909664823  
499205397  
493881288  
493048131  
1097140905  
910226582  
494168621  
910217224  
1088885398  
493714246  
495693086  
1086674587  
541183957  
1120447185  
1093238166  
541192759  
494966902  
493012154  
1097332625  
543416520  
519066373  
494970764  
433290203  
515912421  
505221295  
495269253  
490735872  
910076220  
494587674  
493940013  
1054648360  
495279432  
495800910  
492957479  
557609599  
494468144  
557617505

495640872  
1086453537  
495258116  
1086337368  
1093226184  
502707654  
496170956  
491180236  
1097797657  
1054060765  
972326436  
494239175  
557615457  
1086429121  
493723439  
972470398  
541197574  
557372265  
504369155  
499891080  
541186355  
910052715  
497447154  
503818899  
541203803  
937364833  
928923306  
1094265107  
851153762  
938511716  
91711388  
850996725  
1001923315  
851355850  
1119383801  
502802718  
1119641404  
1094219534  
926635982  
567125526  
757130585  
973024689  
729326913  
1003712717  
1008951143  
1008951143  
729315994  
87294884  
1070294278  
115396981  
523576919  
523576919  
523576919  
780676884
